## Non-valvular atrial fibrillation recurrence after sinus rhythm restoring at different follow-up periods: phenotype-genotype high-risk groups, considering rs10465885 polymorphism in connexin-40 gene

Mikhailieva T.<sup>1</sup>; Sychov O.<sup>1</sup>; Getman T.<sup>1</sup>; Zinchenko Y.<sup>1</sup>; Borodai A.<sup>1</sup>; Solovyan G.<sup>1</sup>; Dorokhina A.<sup>1</sup>; Gurianov V.<sup>2</sup>; Chursina T.<sup>3</sup>; Mikhailiev K.<sup>4</sup>

<sup>1</sup>NSC M.D. Strazhesko Institute of Cardiology NAMS of Ukraine, Kyiv, Ukraine

<sup>2</sup>Bogomolets National Medical University, Kyiv, Ukraine

<sup>3</sup>Bukovinian State Medical University, Chernivtsi, Ukraine

<sup>4</sup>State Institution of Science «Research and Practical Center of Preventive and Clinical Medicine», Kyiv, Ukraine

**Funding Acknowledgements:** Type of funding sources: None.

**Purpose:** to provide risk stratification of non-valvular atrial fibrillation (AF) recurrence after sinus rhythm restoring (SRR) in patients (pts) with AF at different follow-up periods (3 months [AFr3m], 12 months [AFr12m] and 18 months [AFr18m]), based on phenotype-genotype high-risk groups, considering rs10465885 polymorphism in connexin-40 gene (SNP-Cx40).

**Methods.** We enrolled 186 pts (mean age  $(55 \pm 10)$  years; males 123 [66,1%]) with AF (paroxysmal – 86, persistent – 72, stable – 28 pts; first onset (FO) AF – 48 pts). Clinical, laboratory and echocardiographic data were analyzed. SNP-Cx40 was genotyped by real time PCR (T – reference, C – minor allele) in 112 pts. The genotypes were distributed as follows: TT – 25,9% (n = 29); CT – 49,1% (n = 55); CC – 25,0% (n = 28). SRR was performed in 112 cases (102 pts) with non-permanent AF: 30 – pharmacological cardioversion (PCV), 62 – direct-current cardioversion (DCV), 20 cases – radiofrequency ablation (RFA). AFR3m occurred in 53 (43,4%) of 122 available cases; AFR12m – 65,5% (76/116); AFR18m – 75,2% (79/105). The Artificial Neural networks (ANNs) analysis was performed to select the AF recurrence predictors. We considered the ANN activation function value (Y) and its relation to Y cut-off value (Ycrit). In case of  $Y > Y_{crit}$ , the AF recurrence risk was considered as «high».

**Results.** We built three nonlinear ANN models (multilayer perceptrons) for AFR3m ( $Y_{crit} = 0,496$ ), AFR12m ( $Y_{crit} = 0,503$ ) and AFR18m ( $Y_{crit} = 0,720$ ) risk prediction.

In case of SNP-Cx40 CC genotype carriage, we determined the additional increase of AFR3m risk after PCV in pts with CHA2DS2-VASc score «0» and normal ( $Y = 0,629$ ) or mildly decreased ( $Y = 0,616$ ) left ventricular mid-wall fractional shortening, and in the case of its moderate decrease – both after PCV ( $Y = 0,585$ ) and DCV ( $Y = 0,627$ ).

The CC genotype was associated with AFR12m high risk in pts without heart failure (HF) and mildly increased left atrial dimension (LAD) – both after PCV (FO AF with known precise event duration (PED);  $Y = 0,906$ ) or DCV (FO AF with unknown PED;  $Y = 0,911$ ). Additionally, CC genotype was associated with AFR12m high risk after RFA in pts without HF and normal or mildly increased LAD ( $Y = 0,912$ ), and in pts with HF B or C1 stage (according to modified AHA/ACC classification) with moderately increased LAD ( $Y = 0,912$ ).

The high-risk groups of AFR18m in pts with CC genotype were as follows ( $Y = 0,913$ ): after RFA in pts with recurrent AF and presence of episodes lasting  $\geq 7$  days; after PCA in case of FO AF with unknown PED and index episode lasting  $\geq 1$  month; after DCV in case of FO AF with unknown PED and index episode lasting  $\geq 12$  months.

**Conclusion.** AFR3m, AFR12m and AFR18m, besides SNP-Cx40, were non-linearly associated with SRR type, and certain clinical and echocardiographic phenotypic parameters, which could be used for AF recurrence risk stratification, with the selection of phenotype-genotype high-risk groups, considering SNP-Cx40.
